# Supplementary material for: Antigen-Specific Immunotherapy with Thyrotropin Receptor Peptides in Graves' Hyperthyroidism: A Phase I Study
Source: PubMed Central journal article supplement (PMC6648194; doi:10.1089/thy.2019.0036), 2019-07-17
Supplement: Supp_Fig1.pdf [file Supp_Fig1.pdf]

## Supplementary Data

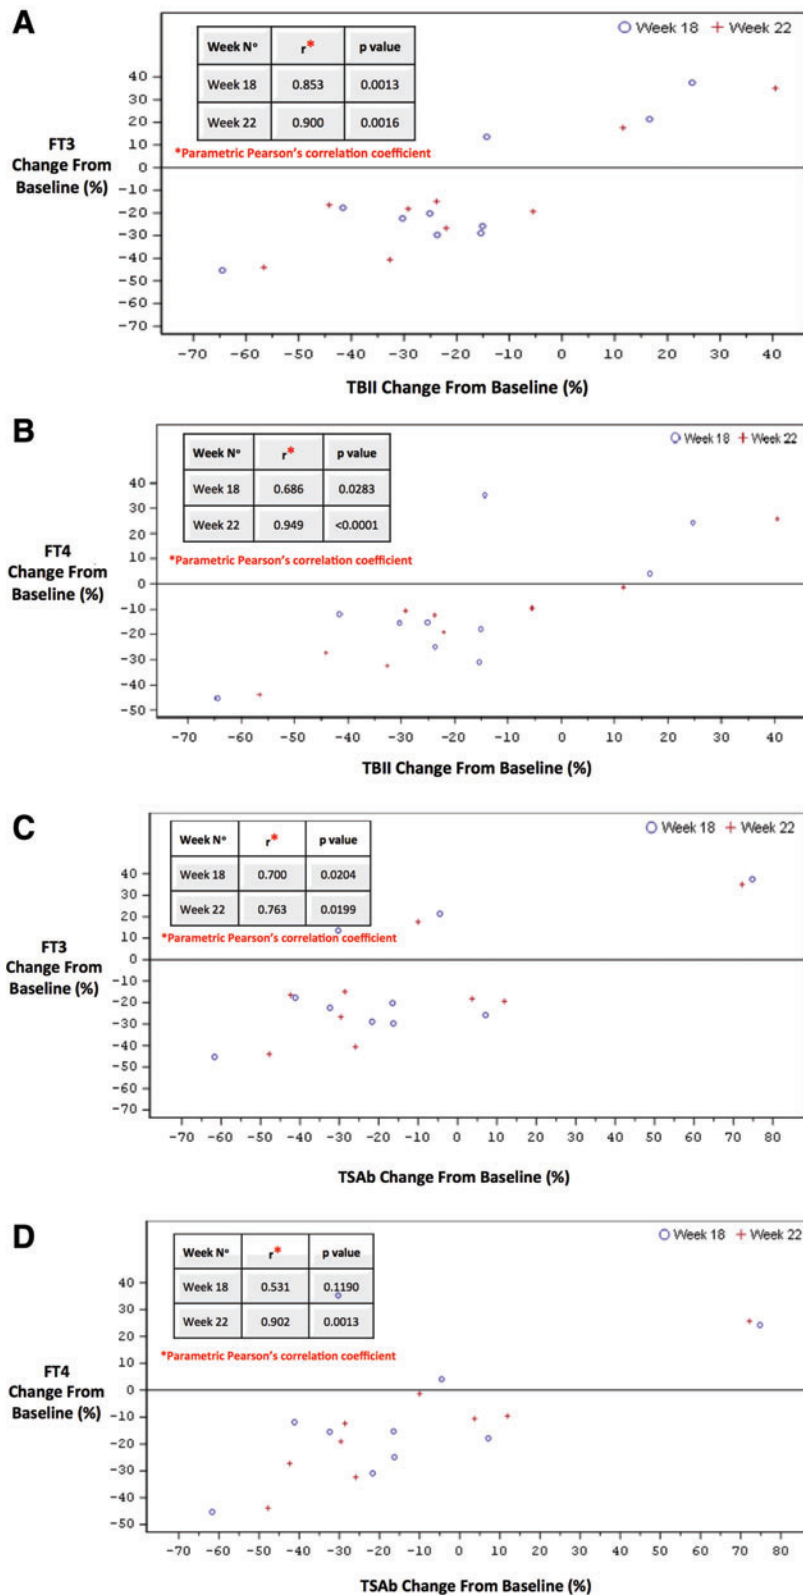

**SUPPLEMENTARY FIG. S1.** Scatter plot of % change in fT3 (A) or fT4 (B) compared to % change in TRAb concentrations from baseline at week 18 (blue circle) and week 22 (red cross); and % change in fT3 (C) or fT4 (D) compared to % change in TSAb concentrations from baseline at week 18 (blue circle) and week 22 (red cross). For both fT3 and fT4 changes, there was a significant correlation with change in TRAb at weeks 18 and 22.
